## The physical boundaries of public goods cooperation between surface-attached bacterial

2 cells

4 Michael Weigert<sup>1, 2, \*</sup> and Rolf Kümmerli<sup>1, \*</sup>

6 \* Corresponding authors

8 <sup>1</sup> Department of Plant- and Microbial Biology, University of Zurich, Winterthurerstrasse 190,  
8057 Zurich, Switzerland

10 <sup>2</sup> Microbiology, Department of Biology I, Ludwig Maximilians University Munich,  
Grosshaderner Strasse 2-4, Martinsried, 82152, Germany.

12 \* Correspondence address: Department of Plant- and Microbial Biology, University of  
Zurich, Winterthurerstrasse 190, 8057 Zurich, Switzerland. Tel: +41 44 635 2907; Fax: +41  
14 44 635 2920; E-mail: rolf.kuemmerli@uzh.ch, michael\_weigert@gmx.net

16 **Abstract**

Bacteria secrete a variety of compounds important for nutrient scavenging, competition  
18 mediation and infection establishment. While there is a general consensus that secreted  
compounds can be shared and therefore have social consequences for the bacterial collective,  
20 we know little about the physical limits of such bacterial social interactions. Here, we address  
this issue by studying the sharing of iron-scavenging siderophores between surface-attached  
22 microcolonies of the bacterium *Pseudomonas aeruginosa*. Using single-cell fluorescent  
microscopy, we show that siderophores, secreted by producers, quickly reach non-producers  
24 within a range of 100  $\mu\text{m}$ , and significantly boost their fitness. Producers in turn respond to  
variation in sharing efficiency by adjusting their pyoverdine investment levels. These social  
26 effects wane with larger cell-to-cell distances and on hard surfaces. Thus, our findings reveal  
the boundaries of compound sharing, and show that sharing is particularly relevant between  
28 nearby yet physically separated bacteria on soft surfaces, matching realistic natural conditions  
such as those encountered in soft tissue infections.

30

**Keywords:** Bacterial social interactions, siderophores, molecule diffusion, single-cell  
32 behaviour, *Pseudomonas aeruginosa*

## 34 **1. Introduction**

The study of cooperative interactions in bacteria is of interdisciplinary interest, as it is  
36 relevant for understanding microbial community assembly (1,2), the establishment of  
infections (3–5) , and biotechnological processes (6). Bacteria exhibit a wide range of  
38 cooperative traits, including the formation of biofilms and fruiting bodies, the secretion of  
toxins to infect hosts, coordinated swarming, and the scavenging of nutrients from the  
40 environment through the secretion of shareable compounds, such as enzymes and  
siderophores (7,8). While the existing body of work has greatly changed our perception of  
42 bacteria – from simple autarkic individuals to sophisticated organisms, interacting and  
cooperating with each other – there are still considerable knowledge gaps. For instance, many  
44 of the insights gained on the sharing of public goods are based on experiments in planktonic  
batch cultures, where behavioural responses are averaged across millions of cells. This  
46 contrasts with the natural lifestyle of bacteria, where individual cells adhere to surfaces and  
form biofilms, and primarily interact with their immediate neighbours at the micrometre scale  
48 (9,10). The mismatch between laboratory and natural conditions has led to controversies in  
the field regarding the general relevance of microbial cooperation (11–13).

50

In our paper, we tackle these issues by testing whether and to what extent secreted  
52 siderophores are shared between surface-attached individuals of the bacterium *Pseudomonas*  
*aeruginosa* using fluorescent microscopy. Siderophores are secondary metabolites produced  
54 by bacteria to scavenge iron from the environment, where it typically occurs in its insoluble  
ferric form or is actively withheld by the host in the context of infections (14,15). In our  
56 experiments, we examined the production and secretion of pyoverdine, the main siderophore  
of *P. aeruginosa* (16), which has become a model trait to study cooperation in bacteria,  
58 because it fulfils all the criteria of a cooperative trait: it is costly to produce and secreted

outside the cell, where it generates benefits in iron-limited media for the producer itself, but  
60 also for nearby individuals with a compatible receptor (17–19). Although highly influential,  
many of the insights gained are based on batch culture experiments, which tell us little about  
62 whether pyoverdine is also shared in surface-attached communities, where molecule diffusion  
might be limited, and thus the range of sharing constrained (13,20). However, such  
64 knowledge is key to understand whether public goods cooperation occurs in natural settings  
and in infections, where bacteria typically live in biofilms attached to organic and inorganic  
66 substrates (8,21).

68 Here, we present data from fluorescence time-laps microscopy experiments that examined  
bacterial interactions in real time at the micrometer scale. First, we tested whether pyoverdine  
70 molecules, secreted by producing cells, reach individuals that cannot produce pyoverdine  
themselves but have the receptor for uptake. Such evidence would be a direct demonstration  
72 of molecule sharing. Second, we test whether pyoverdine serves as a signalling molecule (22),  
allowing producers to respond to changes in their social neighbourhood. Specifically, we  
74 predict that lower pyoverdine investment is required in a cooperative neighbourhood due to  
the efficient reciprocal pyoverdine sharing, whereas non-producers, which act as a sink for  
76 pyoverdine, should trigger increased investment levels to compensate for pyoverdine loss  
(23,24). Third, we examined whether pyoverdine diffusivity limits the range across which  
78 pyoverdine can be efficiently shared. To this end, we manipulated both the media viscosity,  
which directly affects molecule diffusion, and the distance between producer and non-  
80 producer cells, which increases the diffusion time and reduces the amount of pyoverdine  
reaching non-producers. Finally, we used time-laps microscopy to quantify fitness effects of  
82 pyoverdine production and sharing in growing micro-colonies. Taken together, our

experiments shed light on the physical boundaries and individual fitness consequences of  
84 public goods sharing.

## 86 **2. Materials and methods**

### **(a) Strains and media**

88 Our experiments featured the clinical isolate *P. aeruginosa* PAO1 (ATCC 15692), and its  
clean pyoverdine knock-out mutant (PAO1 $\Delta$ *pvdD*), directly derived from this wildtype. To be  
90 able to distinguish the two strains, we used fluorescent variants of these strains constructed  
via chromosomal insertion (*attTn7::ptac-gfp*, *attTn7::ptac-mcherry*) – i.e. PAO1-*gfp*, PAO1-  
92 *mcherry*, PAO1 $\Delta$ *pvdD-gfp* and PAO1 $\Delta$ *pvdD-mcherry*. A preliminary experiment revealed  
that these fluorescent markers did not affect the growth performance of the strains (figure S3).  
94 For our gene expression experiments, we used the reporter strain PAO1*pvdA-gfp*  
(chromosomal insertion: *attB::pvdA-gfp*) (25). PvdA catalyses an important step in the  
96 biosynthesis pathway of pyoverdine (26), and its expression level is therefore a good proxy  
for the investment into pyoverdine production.

98

Overnight cultures were grown in 8 ml Lysogeny Broth (LB) medium in 50 ml Falcon tubes,  
100 and incubated at 37°C, 200 rpm for ca. 17 hours. Cells were then harvested by centrifugation  
(3000 rpm/ 3 minutes) and resuspension in 8 ml of 0.8% (saline solution). Subsequently, we  
102 diluted the washed cultures in saline solution to an OD = 1 (optical density at 600 nm). For all  
microscopy experiments, we used CAA medium (per liter: 5 g casamino acids, 1.18 g  
104 K<sub>2</sub>HPO<sub>4</sub>\*3H<sub>2</sub>O, 0.25 g MgSO<sub>4</sub>\*7H<sub>2</sub>O). To create severe iron limitation, we added 450  $\mu$ M of  
the iron chelator 2,2-Bipyridin. To create iron-replete conditions, we added 200  $\mu$ M FeCl<sub>3</sub>.  
106 All chemicals were purchased from Sigma-Aldrich (Buchs SG, Switzerland).

108 **(b) Preparation of microscopy slides**

We adapted a method previously described in (27). Standard microscopy slides (76 mm x 26  
110 mm) were washed with EtOH and dried in a laminar flow. We used “Gene Frames” (Thermo  
Fisher Scientific) to prepare agarose pads. Each frame features a single chamber of 0.25 mm  
112 thickness (1.5 x 1.6 cm) and 65  $\mu$ l volume. The frame is coated with adhesives on both sides  
so that it sticks both to the microscopy slide and to the cover glass. The sealed chamber is  
114 airtight, which is necessary to prevent evaporation and pad deformation during the  
experiment.

116

To prepare pads, we heated 20 mL CAA supplemented with agarose (1% unless indicated  
118 otherwise) in a microwave. The melted agarose-media mix was subsequently cooled to  
approximately 50°C. Next, we added the supplements: either 2,2-Bipyridin (450  $\mu$ M) or  
120  $\text{FeCl}_3$  (200  $\mu$ M) to create iron-limited or iron-replete conditions, respectively. We pipetted  
360  $\mu$ L of the agarose solution into the gene frame and immediately covered it with a cover  
122 glass. The cover glass was pressed down with a gentle pressure to dispose superfluous media.  
After the solidification of the pad (ca. 30 minutes), we removed the cover glass (by carefully  
124 sliding it sideways) and divided the original pad into 4 smaller pads of equal size by using a  
sterile scalpel. We introduced channels between pads, which served as oxygen reservoir. We  
126 then put 1  $\mu$ L of diluted bacterial culture ( $\text{OD} = 1$  cultured diluted by  $2.5 \cdot 10^{-4}$ ) on each pad.  
Two pads were inoculated with a 1:1 mix of pyoverdine producers and non-producers,  
128 whereas the other pads were inoculated with a monoculture (either producer or non-producer).  
After the drop had evaporated, we sealed the pads with a new cover glass. With this protocol,  
130 we managed to create agarose pads with consistent properties across experiments.

132 **(c) Microscopy setup and imaging**

All experiments were carried out at the Center for Microscope and Image Analysis of the  
134 University Zürich (ZMB) using a widefield Leica DMI6000 microscope. The microscope  
featured a plan APO PH3 objective (NA = 1.3), an automated stage and auto-focus. For  
136 fluorescent imaging, we used a Leica L5 filter cube for GFP (Emission: 480±40 nm,  
Excitation: 527±30 nm, DM = 505) and a Leica TX2 filter cube for mCherry (Emission:  
138 560±40 nm, Excitation: 645±75 nm, DM = 595). Auto-fluorescence of pyoverdine was  
captured with a Leica CFP filter cube (Emission: 436±20 nm, Excitation: 480±40 nm, DM =  
140 455). We used a Leica DFC 350 FX camera (resolution: 1392x1040 pixels) for image  
recording (16 bit colour depth).

142

#### **(d) Image processing and blank subtraction**

144 To extract information (cell size, fluorescence) from single cells, images had first to be  
segmented (i.e. dividing the image into objects and background). Since this is currently a  
146 bottleneck for high throughput image analysis (28), we developed a new rapid, reliable and  
fully automated image segmentation workflow (see supplementary material). The workflow  
148 starts with the machine learning, supervised object classification and segmentation tool ilastik  
(29). Ilastik features a self-learning algorithm that autonomously explores the parameter space  
150 for object recognition. We used a low number of phase contrast images from our experiments  
to train ilastik. Each training round is followed by user inputs regarding segmentation errors.  
152 These inputs are then incorporated in the next training round, until segmentation is optimized  
and error-free. Once the training is completed, batches of microscopy images can be fed to  
154 ilastik and segmentation is then executed automatically.

156 Segmented images were transferred to Fiji, a free scientific image processing software  
package (30). We wrote specific macro-scripts in Fiji to fully automate the simultaneous

158 analysis of multiple single-cell features such as cell size, shape, fluorescence (see  
supplementary material for a step-by-step protocol). Next, we applied a pixel-based blank  
160 correction procedure in Fiji, to obtain unbiased fluorescence intensities for each cell. For each  
agarose pad and time point, we imaged four empty random positions on the agarose pad  
162 without bacterial cells and averaged the grey values for each pixel. The averaged grey value  
of each pixel was then subtracted from the corresponding pixel position in images containing  
164 cells. This pixel-based blank correction accounts for intensity differences across the field of  
view caused by the optical properties of the microscope (vignetting). In the experiments  
166 where we simultaneously measured *pvdA-gfp* expression and pyoverdine fluorescence, we  
had to further correct for the leakage of pyoverdine signal into the GFP-channel. To do so, we  
168 imaged cells of the unmarked wildtype strain, which produced pyoverdine but had no GFP  
reporter. We measured the pyoverdine signal in the GFP-channel at three different time points  
170 (one, three and five hours post-incubation), and then used these values to blank correct the  
fluorescence intensities in cells with the *pvdA*-GFP reporter.

172

#### **(e) Assays measuring *pvdA* expression and pyoverdine fluorescence**

174 To monitor pyoverdine investment by producer cells and pyoverdine uptake by non-producer  
cells, we quantified natural pyoverdine fluorescence in bacterial micro-colonies in mixed and  
176 monocultures over time. For producers, we further measured *pvdA* expression levels over  
time. Because the excitation wavelength for pyoverdine fluorescence overlaps with the UV  
178 range, the high exposure time required to measure natural pyoverdine fluorescence induces  
phototoxicity. Accordingly, each bacterial micro-colony could only be measured once. To  
180 obtain time course data for pyoverdine expression and uptake levels, we thus prepared  
multiple microscopy slides, as described above, and incubated them at 37 °C in a static  
182 incubator. At each time step (one, three and five hours post incubation), we processed two



slides for imaging. Exposure time for measuring gfp-fluorescence was 800 ms and for  
184 pyoverdine 1500 ms, with a (halogen) lamp intensity of 100%. To guarantee reliable  
automated image analysis, we only considered positions that were free from non-bacterial  
186 objects (e.g. dust) and where all cells laid within one focus layer. We recorded at least five  
positions per treatment, time point and slide. The experiment was carried out twice, in two  
188 independent batches.

### **(g) Fitness assays**

190 We used time-laps microscopy to measure the growth performance of pyoverdine producer  
cells (mCherry-tagged) and non-producer cells (GFP-tagged) in mixed and monoculture. We  
192 cut the agarose pad in four patches and inoculated two patches with a 1:1 mix of producers  
and non-producers, and one patch each with a monoculture. We then chose 20 positions (five  
194 per patch) that contained two separated cells (one cell of each strain for mixed cultures and  
two cells of the same type for monocultures), and imaged these positions sequentially every  
196 15 minutes over 5 hours, using the automated stage function of the microscope. Following a  
position change, we used the auto-focus function of the microscope in order to keep cells in  
198 focus.

200 We carried out the above fitness assays across a range of different conditions. In a control  
experiment, we added 200  $\mu\text{M}$   $\text{FeCl}_3$  to the agarose pad to study strain growth in the absence  
202 of iron limitation. Since bacteria grow rapidly in iron-replete media, we stopped the imaging  
after three hours before micro-colonies started to grow in multiple layers. Next, we monitored  
204 strain growth on iron-limited 1% agarose pads supplemented with 450  $\mu\text{M}$  bipyridin. To  
examine whether pyoverdine sharing and fitness effects depend on the distance between two  
206 cells, we performed fitness assays where two cells were positioned: (i) close to one another in  
the same field of view (average distance between cells  $36.21 \mu\text{M} \pm 18.17 \text{ SD}$ ); (ii) further

208 apart in adjacent fields of view (with an estimated minimum distance of 96  $\mu\text{m}$ , given the  
field of view size of 96 x 128  $\mu\text{m}$ ); and (iii) far from one another. This latter condition was  
210 created by adding the two strains on opposite ends of an elongated double-sized agarose pad.  
Finally, we repeated the growth assays in media with increased viscosity using 2 % agarose  
212 pads.

214

### (h) Statistical methods

216 All statistical analyses were performed in R 3.3.0 (31) using linear models (ANOVA or t-  
tests). Prior to analysis, we used the Shapiro-Wilk test to check whether model residuals were  
218 normally distributed. Since each experiment was carried out in multiple independent  
experimental blocks, we scaled values within each block relative to the mean of the control  
220 treatment (i.e. pyoverdine producer monocultures). For all time-laps growth experiments, we  
considered the position (i.e. the field of view) as the level of replication. For the analysis of  
222 single cell fluorescence data, we considered each cell as a replicate.

## 224 3. Results

### (a) Pyoverdine diffuses from producers to non-producers

226 We put mono- and mixed cultures of the wildtype strain PAO1 and its isogenic pyoverdine  
mutant PAO1 $\Delta$ *pvdD* (tagged with a fitness-neutral mCherry marker) on iron-limited agarose  
228 pads on a sealed microscopy slide. Cultures were highly diluted such that single cells were  
physically separated from each other at the beginning of the experiment. We then monitored  
230 the pyoverdine fluorescence in growing micro-colonies over time for both strains under the  
microscope. Pyoverdine fluorescence becomes visible in the periplasma, where molecule  
232 maturation occurs (13,32) (figure 1b). We found that fluorescence in non-producer colonies

was indistinguishable from background signal one hour after incubation, indicating that no  
234 detectable pyoverdine had yet been taken up (figures 1a+c and S1). However, pyoverdine  
fluorescence in non-producer cells significantly increased over time in mixed cultures (LM:  
236  $F_{5,7567} = 913$ ,  $p < 0.001$ ) and was significantly higher than the background fluorescence in  
non-producers growing as monocultures (t-test:  $t_{3945} = 79.33$ ,  $p < 0.001$ , figures 1a+d and S1).  
238 This demonstrates that significant amounts of pyoverdine diffuse from producer to non-  
producer microcolonies even when there is no direct cell-to-cell contact.

240

### **(b) Producers alter pyoverdine investment in the presence of non-producers**

242 To test whether producers respond to changes in their social environment, we followed the  
expression pattern of *pvdA* (a gene involved in pyoverdine synthesis) and natural pyoverdine  
244 fluorescence in growing producer microcolonies (figures 2 and S2). In our control treatment  
with added iron, both *pvdA* and pyoverdine signal were downregulated compared to iron-  
246 limited conditions, demonstrating the functioning and high sensitivity of our reporters. Under  
iron limitation, meanwhile, *pvdA*-expression was significantly higher in mixed compared to  
248 monoculture at one hour (t-test:  $t_{115} = 5.23$ ,  $p < 0.001$ ) and three hours ( $t_{860} = 13.92$ ,  $p <$   
 $0.001$ ) post-incubation (figures 2a and S2a). Pyoverdine fluorescence mirrored *pvdA*  
250 expression patterns, with higher pyoverdine levels being detected in producer cells growing in  
mixed cultures (figures 2b and S2b), although the difference was only significant after three  
252 hours (t-test:  $t_{992} = 13.30$ ,  $p < 0.001$ ), but not after one hour (t-test:  $t_{88} = 1.26$ ,  $p = 0.211$ ). The  
picture changed five hours post-incubation, where both *pvdA*-expression and pyoverdine  
254 fluorescence were significantly lower in mixed compared to monocultures (*pvdA*-expression:  
 $t_{6441} = -16.67$ ,  $p < 0.001$ ; pyoverdine fluorescence:  $t_{6017} = -50.01$ ,  $p < 0.001$ ). These analyses  
256 demonstrate that producers rapidly alter pyoverdine investment in response to the presence of  
non-producers.

258

### (c) Pyoverdine non-producers outgrow producers in mixed cultures

260 After having established that pyoverdine is shared between neighbouring, yet physically  
separated surface-attached microcolonies, we explored the fitness consequences of  
262 pyoverdine sharing. This is important because experiments in liquid batch cultures repeatedly  
revealed that non-producers can outcompete producers, by saving the cost of pyoverdine  
264 production, yet exploiting the siderophores produced by others, a phenomenon that is called  
“cheating” (17,33–36). To examine whether cheating is also possible when bacteria grow as  
266 surface-attached microcolonies, we grew producers and non-producers in mono and mixed  
culture and followed microcolony growth dynamics over time (figure 3). Control experiments  
268 in iron-supplemented media revealed that all strains grew equally well regardless of whether  
they grew in mono or mixed cultures (figure S4). In iron-limited media, however, we found  
270 that microcolony growth was significantly reduced for non-producers compared to producers  
(growth rate:  $t_{23} = -10.57$ ,  $p < 0.001$ , figure 3e; cell number:  $t_{23} = -10.27$ ,  $p < 0.001$ , figure 3g).  
272 This shows that the inability to produce pyoverdine is a major handicap in iron-limited media.

274 This fitness pattern diametrically flipped in mixed cultures, where non-producer  
microcolonies grew significantly faster ( $t_{35} = 2.64$ ,  $p = 0.012$ , figure 3f) and to higher cell  
276 numbers ( $t_{31} = 2.48$ ,  $p = 0.019$ , figure 3h) than producer microcolonies. Intriguingly, non-  
producers experienced a relative fitness advantage between hours one and three (t-test:  $t_{20} =$   
278  $4.53$ ,  $p < 0.001$ ), but not at later time points ( $t_{22} = 4.46$ ,  $p < 0.001$ ; figure S5). This specific  
period, at which the relative fitness advantage manifests, perfectly matches the timeframe  
280 during which producers exhibited highest *pvdA* expression levels, and non-producers started  
accumulating pyoverdine (figure 2 and S2). Our findings thus provide a direct temporal link  
282 between the high costs of pyoverdine investment to producers, the increased benefits accruing

to non-producers, and the resulting opportunity for non-producers to act as cheaters and to  
284 successfully outcompete producers.

#### 286 **(d) The physical boundaries of pyoverdine sharing and benefits for non-producers**

The above experiments revealed that pyoverdine can be shared between two physically  
288 separated microcolonies when grown in the same field of view (128 x 96  $\mu\text{m}$ ) under the  
microscope (average  $\pm$  SD distance between cells  $d = 36.2 \pm 18.2 \mu\text{m}$ ). Next, we asked what  
290 the physical limit of pyoverdine sharing is. We thus repeated to above experiment, but this  
time we focussed on non-producer cells that had no producer cell within the same field of  
292 view, but only a more distant producer in an adjacent field of view (minimal distance  $d \sim 100$   
 $\mu\text{m}$ ). Under these conditions, we found that non-producers benefited from the presence of  
294 more distant producers in the same way as they benefited from the presence of a close  
producer (figure 4a+b; significantly increased growth of non-producers in mixed culture, for  $d$   
296  $\sim 100 \mu\text{m}$ , t-test:  $t_{14} = 4.02$ ,  $p = 0.001$ ). However, contrary to the previous observation (figure  
4a), the producer no longer experienced a significant growth reduction in the presence of a  
298 more distant non-producer (figure 4b, for  $d \sim 100 \mu\text{m}$ ,  $t_9 = -0.80$ ,  $p = 0.442$ ). We then  
expanded the distance between non-producers and producers even further by adding the two  
300 strains on opposite ends of a double-sized agarose pad. In contrast to the previous results,  
these assays revealed that non-producers had significantly lower number of doublings in both  
302 mixed ( $t_{13} = -2.41$ ,  $p = 0.032$ ) and monocultures ( $t_9 = -4.66$ ,  $p = 0.001$ ) (figure 4c), showing  
that pyoverdine diffusion and sharing is disabled across this large distance in the timeframe  
304 analysed.

306 In addition, our microscopy experiment revealed that pyoverdine sharing did not only affect  
the doubling rate of cells but also their size (figure S6). While non-producer cells were

308 significantly smaller than producer cells in monoculture (LM:  $F_{1,1294} = 150.90$ ,  $p < 0.001$ ,  
measured three hours post-incubation), the cell size of non-producers significantly increased  
310 when grown together with a nearby producing neighbour (same field of view  $d \sim 36 \mu\text{m}$ :  $t_{446}$   
 $= 10.24$ ,  $p < 0.001$ , figure S6 a; adjacent field of view  $d \sim 100 \mu\text{m}$ :  $t_{161} = 4.10$ ,  $p < 0.001$ ,  
312 figure S6 b), but not when producers were far away (on opposite ends of the agarose pad:  
 $t_{263} = 0.45$ ,  $p = 0.660$ , figure S6 c).

314

While the above experiments examined pyoverdine sharing on 1% agarose pads – a solid yet  
316 still moist environment – we were wondering whether pyoverdine sharing is also possible on  
much harder and drier surfaces. To test this possibility, we repeated the growth experiments  
318 on 2% agarose pads. Under these conditions, we observed that non-producers no longer  
benefited from growing next to producers (no significant difference in the doubling numbers  
320 between mono and mixed cultures:  $t_{14} = -0.98$ ,  $p = 0.346$ ) (figure 5). This finding is  
compatible with the view that molecule diffusion is much reduced on very hard surfaces,  
322 preventing pyoverdine sharing between adjacent microcolonies.

#### 324 **4. Discussion**

Our single-cell analysis on pyoverdine production in *P. aeruginosa* provides several novel  
326 insights on the social interaction dynamics between surface-attached bacteria. First, we found  
that pyoverdine secreted by producer cells is taken up by physically separated non-producer  
328 cells, thereby directly demonstrating pyoverdine sharing. Second, we discovered that  
producer cells rapidly adjust pyoverdine expression levels when non-producers are nearby, by  
330 first up-regulating and then down-regulating pyoverdine investment. Third, we demonstrate  
that pyoverdine sharing has fitness consequences, as it boosts the growth and cell size of non-  
332 producers when growing in the vicinity of producers. Finally, we explored the physical limits

of pyoverdine sharing and show that on soft surfaces, pyoverdine can be shared across a  
334 considerably large scale (at least 100  $\mu$ M, i.e.  $\sim$  50 times the length of a bacterium), whereas  
efficient sharing is impeded with larger distances between cells and on hard surfaces.  
336 Altogether, our experiments suggest that public goods sharing and exploitation can take place  
between surface-attached bacteria across a wide range of naturally relevant conditions, and is  
338 mediated by molecule diffusion without the need for direct cell-to-cell contact.

340 Our results oppose previous work claiming that pyoverdine is predominantly shared between  
adjacent cells within the same microcolony (13). This claim has provoked a controversy on  
342 whether pyoverdine, and secreted compounds in general, can indeed be regarded as public  
goods (12,37). The difference between our experiments and the ones performed by Julou et al.  
344 (13) is that their study solely examined pyoverdine content of cells within the same  
microcolony. Unlike in our study, there was no direct test of whether pyoverdine diffuses to  
346 neighbouring microcolonies and what the fitness consequences of such diffusion would be.  
While we agree that a considerable amount of pyoverdine is probably shared within the  
348 microcolony, we here demonstrate that a significant amount of this molecule also diffuses out  
of the microcolony, providing significant growth benefits to physically separated  
350 neighbouring microcolonies. Thus, our work concisely resolves the debate by showing that  
secreted hydrophilic compounds, such as pyoverdine (38), can be considered as public goods,  
352 even in structured environments, with the amount of sharing and the associated fitness  
consequences being dependent on the distance between neighbouring microcolonies.  
354 Moreover, the distance effect we report here at the single-cell level is in line with density  
effects described at the community level, where secreted compounds are predominantly  
356 shared and become exploitable at higher cell densities (i.e. when cell-to-cell distance is  
reduced 39–42).

358

A key advantage of single-cell analyses is that it allows the tracking of bacterial behavioural  
360 and growth changes in real time with high precision, immediately after the start of an  
experiment. This contrasts with batch culture experiments, where responses can only be  
362 measured after several hours, once the proxies for responses (e.g. optical density) become  
detectable at the population level. For instance, results from previous batch-culture studies  
364 suggest that pyoverdine producers seem to overinvest in pyoverdine when grown together  
with non-producers (23,24). However, the interpretation of these results based upon a number  
366 of assumptions, and the batch-culture approach precluded an in-depth analysis of the temporal  
pattern and consequences of such overinvestment. Our analysis now provides a nuanced view  
368 on the interactions between producers and non-producers. We could show that soon after the  
inoculation of bacteria on the agarose pad, producers started overexpressing pyoverdine  
370 (figures 2 and S2), which coincided with pyoverdine accumulation in non-producer cells  
(figures 1 and S1), and significant fitness advantages to non-producers (figure S5). Moreover,  
372 these findings indicate that producers can possibly respond to exploitation by down-  
regulating pyoverdine production at later time points, a response that correlated with the  
374 abolishment of further fitness advantages to non-producers.

376 Our considerations above raise questions regarding the regulatory mechanisms involved in  
controlling the observed expression changes. Molecular studies suggest that pyoverdine  
378 serves as a signalling molecule regulating its own production (22,43). Specifically, when iron-  
loaded pyoverdine binds to its cognate receptor FpvA, a signalling cascade is triggered, which  
380 results in the release of PvdS (the iron-starvation sigma factor, initially bound to the inner cell  
membrane by the anti-sigma factor FpvR). PvdS then upregulates pyoverdine production.  
382 This positive feedback, triggered by successful iron uptake, is opposed by a negative feedback



operated by Fur (ferric uptake regulator), which silences pyoverdine synthesis once enough  
384 iron has been taken up (16,44). Our results can be interpreted in the light of these feedbacks,  
given that the relative strength of the opposing feedbacks determines the resulting pyoverdine  
386 investment levels (45). For example, producer micro-colonies reach higher cell densities in  
mono-compared to mixed cultures (figure 3, after 3h:  $13.2 \pm 2.3$  versus  $6.7 \pm 1.3$  cells; after  
388 5h:  $122.7 \pm 17.9$  versus  $55.0 \pm 8.1$  cells, respectively). Higher cell densities likely lead to  
more efficient pyoverdine sharing, which supposedly stimulates both pyoverdine-signalling  
390 and iron uptake. Positive and negative feedback should thus be in balance and result in an  
intermediate pyoverdine investment levels. Conversely, when producers grow in mixed  
392 cultures then cell density is reduced and non-producers serve as a sink for pyoverdine, thereby  
reducing iron supply to producers. In this scenario, the positive feedback should be stronger  
394 than the negative feedback, resulting in the upregulation of pyoverdine. While these  
elaborations are compatible with the pyoverdine expression patterns observed at hour one and  
396 three, the flip in expression patterns between mono and mixed cultures after five hours is  
more difficult to explain. One option would be that the previously described switch from  
398 pyoverdine production to recycling (46–48) occurs earlier in mixed than in monocultures. An  
alternative option would be that producers can recognize the presence of exploitative cheaters  
400 and downscale their cooperative efforts accordingly.

402 Our results showing that non-producers can outcompete producers in mixed cultures, even  
when microcolonies are physically separated, confirms predictions from social evolution  
404 theory for microbes (49–52). One key condition required for cooperation to be maintained is  
that cooperative acts must be more often directed towards other cooperators than expected by  
406 chance. This interaction probability is measured as the degree of relatedness  $r$ , a parameter  
central to inclusive fitness theory (53,54). Traditionally, high relatedness has been associated

408 with the physical separation of cooperators and non-cooperators into distinct patches (54).

Our results now show that this traditional view is not necessarily applicable to public goods  
410 cooperation in bacteria, because the physical separation of pyoverdine producers and non-  
producers is insufficient to prevent exploitations and maintain cooperation (figure 3). Clearly,  
412 relatedness in our scenario should be measured at the scale at which pyoverdine sharing can  
occur (50), which exceeds the boundaries of a single microcolony. Thus, in scenarios where  
414 microbial cells are immobile, it is the diffusion properties of the public good that determines  
the degree of relatedness between interacting partners (49,51).

416

In summary, our finding on pyoverdine sharing and exploitation between physically separated  
418 microcolonies has broad implications for our understanding of the social life of bacteria in  
many natural settings. This is because bacteria typically live in surface-attached communities  
420 in aquatic and terrestrial ecosystems, as well as in infections (8,21). Many of these natural  
habitats feature soft surfaces, as mimicked by our experimental set up, making the diffusion  
422 and sharing of secreted compounds between cells highly likely. However, our work also  
reveals physical limits to public goods cooperation, namely on hard surfaces, where public  
424 good diffusion and sharing is impeded. This shows that whether or not a secreted compound  
is shared is context-dependent (38), and relies, amongst other factors, on the physical  
426 properties of the environment.

428 **Data Archiving Statement**

Upon acceptance, raw data and the code for single cell analysis will be made available on

430 Dryad.

432 **Contributions**

MW and RK developed the experimental methods. MW carried out the experiments. MW and

434 RK carried out the statistical analysis. MW and RK drafted the manuscript and all authors gave final approval for publication.

436

**Competing interests**

438 None declared.

440 **Funding statement**

MW was founded by the DAAD and RK was founded by the SNSF (grant no.

442 PP00P3\_165835) and the ERC (grant no. 681295)

444 **Acknowledgments**

We thank Urs Ziegler and Caroline Aemisegger for help with the microscope, Moritz

446 Kirschmann for advice regarding single cell data analysis.

448

## References

- 450 1. Leinweber A, Fredrik Inglis R, Kümmerli R. Cheating fosters species co-existence in  
well-mixed bacterial communities. *ISME J.* 2017 Jan 6; DOI: 10.1038/ismej.2016.195
- 452 2. Jousset A, Eisenhauer N, Materne E, Scheu S. Evolutionary history predicts the  
stability of cooperation in microbial communities. *Nat Commun.* 2013;4:2573. DOI:  
454 10.1038/ncomms3573
3. Köhler T, Buckling A, van Delden C. Cooperation and virulence of clinical  
456 *Pseudomonas aeruginosa* populations. *Proc Natl Acad Sci.* 2009;106(15):6339–44.  
DOI: 10.1073/pnas.0811741106
- 458 4. Alizon S, Lion S. Within-host parasite cooperation and the evolution of virulence. *Proc*  
*R Soc B Biol Sci.* 2011 Dec 22;278(1725):3738–47. DOI: 10.1098/rspb.2011.0471
- 460 5. Pollitt EJG, West SA, Crusz SA, Burton-Chellew MN, Diggle SP. Cooperation,  
quorum sensing, and evolution of virulence in *Staphylococcus aureus*. *Infect Immun.*  
462 2014;82(3):1045–51. DOI: 10.1128/IAI.01216-13
6. Bachmann H, Bruggeman FJ, Molenaar D, Branco dos Santos F, Teusink B. Public  
464 goods and metabolic strategies. *Curr Opin Microbiol.* 2016 Jun;31:109–15. DOI:  
10.1016/j.mib.2016.03.007
- 466 7. West SA, Diggle SP, Buckling A, Gardner A, Griffin AS. The Social Lives of  
Microbes. *Annu Rev Ecol Evol Syst.* 2007;38(1):53–77. DOI:  
468 10.1146/annurev.ecolsys.38.091206.095740
8. Nadell CD, Xavier JB, Foster KR. The sociobiology of biofilms. *FEMS Microbiol Rev.*  
470 2009;33(1):206–24. DOI: 10.1111/j.1574-6976.2008.00150.x

9. Nadell CD, Bassler BL. A fitness trade-off between local competition and dispersal in  
472 *Vibrio cholerae* biofilms. Proc Natl Acad Sci U S A. 2011;108(34):14181–5. DOI:  
10.1073/pnas.1111147108
- 474 10. Drescher K, Nadell CD, Stone HA, Wingreen NS, Bassler BL. Solutions to the public  
goods dilemma in bacterial biofilms. Curr Biol. 2014;24(1):50–5. DOI:  
476 10.1016/j.cub.2013.10.030
11. Foster KR, Bell T. Competition, not cooperation, dominates interactions among  
478 culturable microbial species. Curr Biol. 2012;22(19):1845–50. DOI:  
10.1016/j.cub.2012.08.005
- 480 12. Zhang X-X, Rainey PB. Exploring the Sociobiology of Pyoverdine-Producing  
*Pseudomonas*. Evolution (N Y). 2013 Nov;67(11):3161–74. DOI: 10.1111/evo.12183
- 482 13. Julou T, Mora T, Guillon L, Croquette V, Schalk IJ, Bensimon D, et al. Cell-cell  
contacts confine public goods diffusion inside *Pseudomonas aeruginosa* clonal  
484 microcolonies. Proc Natl Acad Sci U S A. 2013;110(31):12577–82. DOI:  
10.1073/pnas.1301428110
- 486 14. Ratledge C, Dover LG. Iron metabolism in pathogenic bacteria. Annu Rev Microbiol.  
2000;54:881–941. DOI: 10.1146/annurev.micro.54.1.881
- 488 15. Miethke M, Marahiel MA. Siderophore-based iron acquisition and pathogen control.  
Microbiol Mol Biol Rev. 2007;71(3):413–51. DOI: 10.1128/MMBR.00012-07
- 490 16. Visca P, Imperi F, Lamont IL. Pyoverdine siderophores: from biogenesis to  
biosignificance. Trends Microbiol. 2007;15(1):22–30. DOI: 10.1016/j.tim.2006.11.004
- 492 17. Griffin AS, West SA, Buckling A. Cooperation and competition in pathogenic bacteria.

Nature. 2004;430(August). DOI: 10.1038/nature02802.1.

- 494 18. Buckling A, Harrison F, Vos M, Brockhurst M a, Gardner A, West S a, et al.  
Siderophore-mediated cooperation and virulence in *Pseudomonas aeruginosa*. FEMS  
496 Microbiol Ecol. 2007;62(2):135–41. DOI: 10.1111/j.1574-6941.2007.00388.x
19. Inglis RF, Biernaskie JM, Gardner A, Kümmerli R. Presence of a loner strain maintains  
498 cooperation and diversity in well-mixed bacterial communities. Proc R Soc B Biol Sci.  
2016 Jan 13;283(1822):20152682. DOI: 10.1098/rspb.2015.2682
- 500 20. Kümmerli R, Gardner A, West SA, Griffin AS. Limited dispersal, budding dispersal,  
and cooperation: an experimental study. Evolution. 2009;63(4):939–49. DOI:  
502 10.1111/j.1558-5646.2008.00548.x
21. Flemming H-C, Wingender J, Szewzyk U, Steinberg P, Rice SA, Kjelleberg S.  
504 Biofilms: an emergent form of bacterial life. Nat Rev Microbiol. 2016 Aug  
11;14(9):563–75. DOI: 10.1038/nrmicro.2016.94
- 506 22. Lamont IL, Beare PA, Ochsner U, Vasil AI, Vasil ML. Siderophore-mediated signaling  
regulates virulence factor production in *Pseudomonas aeruginosa*. Proc Natl Acad Sci.  
508 2002;99(10):7072–7. DOI: 10.1073/pnas.092016999
23. Kümmerli R, Jiricny N, Clarke LS, West SA, Griffin AS. Phenotypic plasticity of a  
510 cooperative behaviour in bacteria. J Evol Biol. 2009;22(3):589–98. DOI:  
10.1111/j.1420-9101.2008.01666.x
- 512 24. Harrison F. Dynamic social behaviour in a bacterium: *Pseudomonas aeruginosa*  
partially compensates for siderophore loss to cheats. J Evol Biol. 2013;26:1370–8.  
514 DOI: 10.1111/jeb.12126

25. Kaneko Y, Thoendel M, Olakanmi O, Britigan BE, Singh PK. The transition metal  
516 gallium disrupts *Pseudomonas aeruginosa* iron metabolism and has antimicrobial and  
antibiofilm activity. *J Clin Invest*. 2007;117(4):877–88. DOI: 10.1172/JCI30783
- 518 26. Leoni L, Ciervo A, Orsi N, Visca P. Iron-regulated transcription of the *pvdA* gene in  
*Pseudomonas aeruginosa*: effect of Fur and PvdS on promoter activity. *J Bacteriol*.  
520 1996;178(8):2299–313.
27. de Jong IG, Beilharz K, Kuipers OP, Veening J-W. Live cell imaging of *Bacillus*  
522 *subtilis* and *Streptococcus pneumoniae* using automated time-lapse microscopy. *J Vis*  
*Exp*. 2011;(53). DOI: 10.3791/3145
- 524 28. Van Valen DA, Kudo T, Lane KM, Macklin DN, Quach NT, DeFelice MM, et al.  
Deep Learning Automates the Quantitative Analysis of Individual Cells in Live-Cell  
526 Imaging Experiments. *PLOS Comput Biol*. 2016 Nov 4;12(11):e1005177. DOI:  
10.1371/journal.pcbi.1005177
- 528 29. Sommer C, Strähle C, Köthe U, Hamprecht FA. ilastik: Interactive Learning and  
Segmentation Toolkit. Eighth IEEE Int Symp Biomed Imaging. 2011;230–3. DOI:  
530 10.1109/ISBI.2011.5872394
30. Schindelin J, Arganda-Carreras I, Frise E, Kaynig V, Longair M, Pietzsch T, et al. Fiji:  
532 an open-source platform for biological-image analysis. *Nat Methods*. 2012;9(7):676–  
82. DOI: 10.1038/nmeth.2019
- 534 31. R Development Core Team. R: A language and environment for statistical computing.  
Vienna, Austria: R Foundation for Statistical Computing; 2015.
- 536 32. Schalk IJ, Guillon L. Fate of ferrisiderophores after import across bacterial outer

- membranes: different iron release strategies are observed in the cytoplasm or periplasm  
538 depending on the siderophore pathways. *Amino Acids*. 2013;44(5):1267–77. DOI:  
10.1007/s00726-013-1468-2
- 540 33. Harrison F, Browning LE, Vos M, Buckling A. Cooperation and virulence in acute  
*Pseudomonas aeruginosa* infections. *BMC Biol*. 2006;4(1):21. DOI: 10.1186/1741-  
542 7007-4-21
34. West SA, Griffin AS, Gardner A. Evolutionary Explanations for Cooperation. *Curr*  
544 *Biol*. 2007;17(16):661–72. DOI: 10.1016/j.cub.2007.06.004
35. Kümmerli R, van den Berg P, Griffin A, West SA, Gardner A. Repression of  
546 competition favours cooperation: experimental evidence from bacteria. *J Evol Biol*.  
2010;23(4):699–706. DOI: 10.1111/j.1420-9101.2010.01936.x
- 548 36. Ghoul M, West SA, Diggle SP, Griffin AS. An experimental test of whether cheating is  
context dependent. *J Evol Biol*. 2014;27:551–6. DOI: 10.1111/jeb.12319
- 550 37. Kümmerli R, Ross-Gillespie A. Explaining the Sociobiology of Pyoverdinin Producing  
*Pseudomonas*: a Comment on Zhang and Rainey (2013). *Evolution*. 2013;1–7. DOI:  
552 10.1111/evo.12311
38. Kümmerli R, Schiessl KT, Waldvogel T, McNeill K, Ackermann M. Habitat structure  
554 and the evolution of diffusible siderophores in bacteria. *Ecol Lett*. 2014  
Dec;17(12):1536–44. DOI: 10.1111/ele.12371
- 556 39. Greig D, Travisano M. The Prisoner’s Dilemma and polymorphism in yeast SUC  
genes. *Proc R Soc B Biol Sci*. 2004 Feb 7;271(Suppl\_3):S25–6. DOI:  
558 10.1098/rsbl.2003.0083



40. Ross-Gillespie A, Gardner A, Buckling A, West SA, Griffin AS. Density dependence  
560 and cooperation: theory and a test with bacteria. *Evolution*. 2009;63(9):2315–25. DOI:  
10.1111/j.1558-5646.2009.00723.x
- 562 41. van Gestel J, Weissing FJ, Kuipers OP, Kovács AT. Density of founder cells affects  
spatial pattern formation and cooperation in *Bacillus subtilis* biofilms. *ISME J*.  
564 2014;8(10):2069–79. DOI: 10.1038/ismej.2014.52
42. Scholz RL, Greenberg EP. Sociality in *Escherichia coli*: Enterochelin Is a Private Good  
566 at Low Cell Density and Can Be Shared at High Cell Density. *J Bacteriol*. 2015 Jul  
1;197(13):2122–8. DOI: 10.1128/JB.02596-14
- 568 43. Beare PA, For RJ, Martin LW, Lamont IL. Siderophore-mediated cell signalling in  
*Pseudomonas aeruginosa*: divergent pathways regulate virulence factor production and  
570 siderophore receptor synthesis. *Mol Microbiol*. 2002;47(1):195–207. DOI:  
10.1046/j.1365-2958.2003.03288.x
- 572 44. Ochsner UA, Vasil ML. Gene repression by the ferric uptake regulator in  
*Pseudomonas aeruginosa*: cycle selection of iron-regulated genes. *Proc Natl Acad Sci*  
574 U S A. 1996;93:4409–14.
45. Weigert M, Ross-Gillespie A, Leinweber A, Pessi G, Brown SP, Kümmerli R.  
576 Manipulating virulence factor availability can have complex consequences for  
infections. *Evol Appl*. 2017 Jan;10(1):91–101. DOI: 10.1111/eva.12431
- 578 46. Faraldo-Gómez JD, Sansom MSP. Acquisition of siderophores in Gram-negative  
bacteria. *Nat Rev Mol Cell Biol*. 2003 Feb;4(2):105–16. DOI: 10.1038/nrm1015
- 580 47. Imperi F, Tiburzi F, Visca P. Molecular basis of pyoverdine siderophore recycling in

- 582 *Pseudomonas aeruginosa*. Proc Natl Acad Sci U S A. 2009;106(48):20440–5. DOI:  
10.1073/pnas.0908760106
48. Kümmerli R, Brown SP. Molecular and regulatory properties of a public good shape  
584 the evolution of cooperation. Proc Natl Acad Sci U S A. 2010;107(44):18921–6. DOI:  
10.1073/pnas.1011154107
- 586 49. Allison SD. Cheaters, diffusion and nutrients constrain decomposition by microbial  
enzymes in spatially structured environments. Ecol Lett. 2005 Apr 12;8(6):626–35.  
588 DOI: 10.1111/j.1461-0248.2005.00756.x
50. West SA, Griffin AS, Gardner A, Diggle SP. Social evolution theory for  
590 microorganisms. Nat Rev Microbiol. 2006;4(8):597–607. DOI: 10.1038/nrmicro1461
51. Driscoll WW, Pepper JW. Theory for the evolution of diffusible external goods.  
592 Evolution. 2010;64(9):2682–7. DOI: 10.1111/j.1558-5646.2010.01002.x
52. Dobay A, Bagheri HC, Messina A, Kümmerli R, Rankin DJ. Interaction effects of cell  
594 diffusion, cell density and public goods properties on the evolution of cooperation in  
digital microbes. J Evol Biol. 2014;27:1869–77. DOI: 10.1111/jeb.12437
- 596 53. Hamilton WD. The genetical evolution of social behaviour. J Theor Biol. 1964;7:1–52.
54. Frank SA. Foundations of Social Evolution. Princeton: Princeton University Press;  
598 1998. 280 p.
- 600

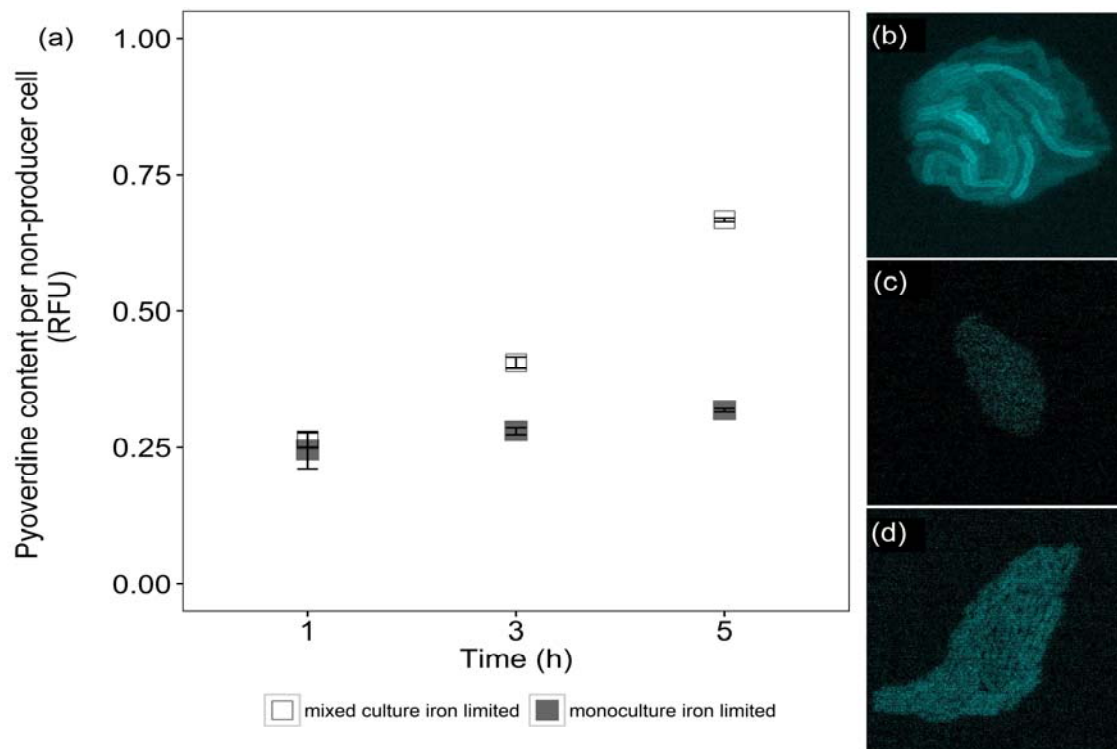

602 **Figure 1.** Pyoverdine is taken up by non-producing cells in a time-dependent manner, demonstrating  
604 pyoverdine sharing between physically separated, surface-attached micro-colonies. (a) Time-course  
606 measures on natural pyoverdine fluorescence units (RFU) shows constant background fluorescence in  
608 non-producer cells grown in monocultures (filled squares), whereas pyoverdine fluorescence  
610 significantly increased in non-producer cells grown in mixed cultures with producers (open squares).  
612 Mean relative fluorescence values  $\pm$  standard errors are scaled relative to producer monocultures after  
614 one hour of growth. Representative microscopy pictures show pyoverdine fluorescence in a producer  
microcolony (b), a non-producer colony from a monoculture (c), and a non-producer colony from a  
mixed culture (d). Important to note is that only apo-pyoverdine (i.e. iron-free) is fluorescent, and  
therefore the measured fluorescence intensities represent a conservative measure of the actual  
pyoverdine content per cell. Furthermore, the fluorescence intensity in producer cells is always higher  
than in non-producer cells because it represents the sum of pyoverdine uptake and newly synthesized  
pyoverdine, whereas for non-producers, fluorescence represents pyoverdine uptake only.

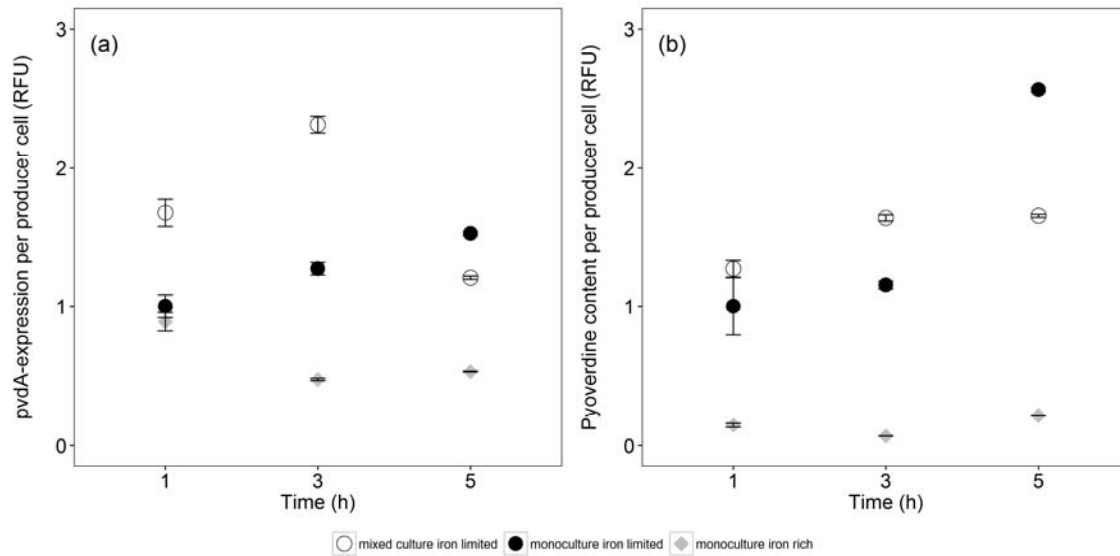

616

**Figure 2.** Producer cells adjust their pyoverdine investment level in response to changes in the social environment. (a) Time-course data show that *pvdA*, a gene encoding an enzyme involved in pyoverdine synthesis, is down-regulated in iron-rich media (grey diamonds), but up-regulated in iron-deplete media. Importantly, producers exhibited different *pvdA* expression patterns depending on whether they grew together with non-producers (open circles) or as monoculture (filled circles). While producers showed increased gene expression in mixed compared to monoculture after one and three hours, the pattern flipped after five hours. (b) The same qualitative pattern was observed when measuring pyoverdine content per cell, as relative fluorescence units (RFU). Fluorescence values are scaled relative to the producer monocultures after one hour of growth. Error bars indicate standard errors of the mean.

618

620

622

624

626

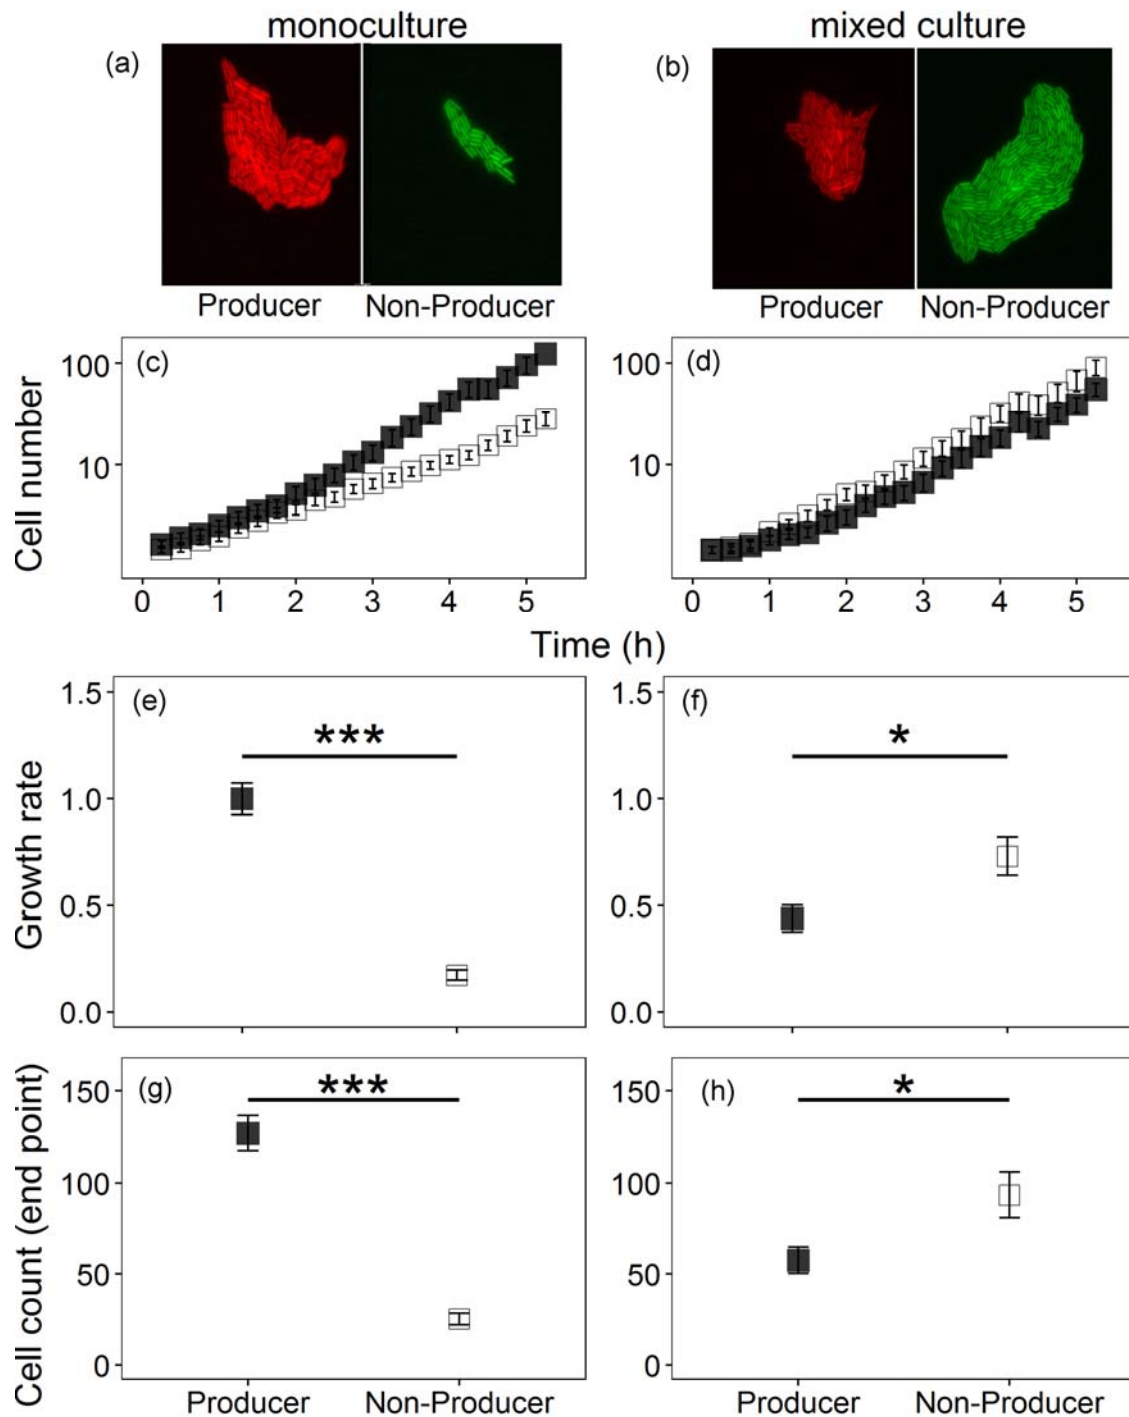

628

**Figure 3.** Growth performance of surface-attached microcolonies of pyoverdine producers (filled squares) and non-producers (open squares) in monocultures (left column) and mixed cultures (right column). While pyoverdine non-producers show growth deficiencies in monoculture, due to their inability to scavenge iron, they outcompete the producers in mixed cultures. This growth pattern shows that non-producers save costs by not making any pyoverdine, yet gain fitness benefits by capitalizing on the pyoverdine secreted by the producers. (a) and (b) show representative microscopy

630

632

634

636 pictures for monocultures and mixed cultures, respectively. The overall growth trajectories of  
producers and non-producers differ substantially between monocultures (**c**) and mixed cultures (**d**).  
638 While producers had a significantly higher growth rate (**e**) and grew to higher cell numbers (**g**) in  
monocultures, the exact opposite was the case in mixed cultures for both the growth rate (**f**) and cell  
640 number (**h**). Growth parameters are given relative to the producers in monoculture. Asterisks indicate  
significant differences and error bars denote standard errors of the mean.

642

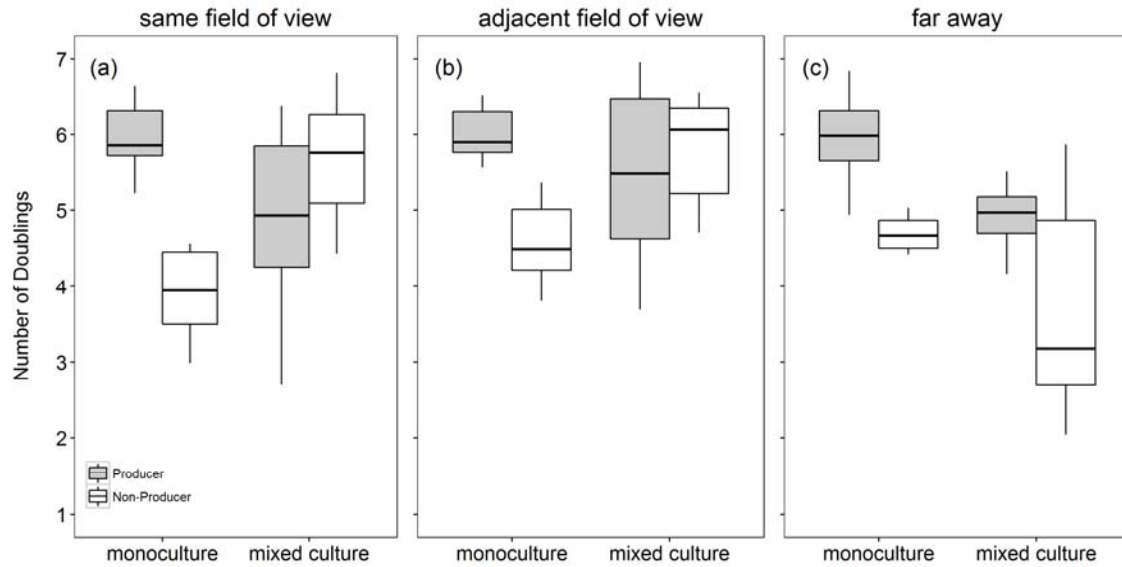

644 **Figure 4.** The relative fitness advantage of pyoverdine non-producers in mixed cultures is dependent  
646 on the distance between producer (grey) and non-producer (white) microcolonies. In monoculture  
648 assays, the non-producers had significantly lower number of doublings than the producers in all  
650 experiments. In mixed cultures, meanwhile, the number of doublings of non-producers significantly  
652 increased when the producer microcolony was (a) within the same field of view (average distance  
between cells 36  $\mu\text{m}$ ), (b) in an adjacent field of view (minimal distance  $\sim 100 \mu\text{m}$ ), but not when  
producers were far away (on opposite ends of the agarose pad) (c). These analyses show that  
pyoverdine can be shared and exploited across a relative large distance. Boxplots represent the median  
with 25<sup>th</sup> and 75<sup>th</sup> percentiles and whiskers show the 1.5 interquartile range (IQR).

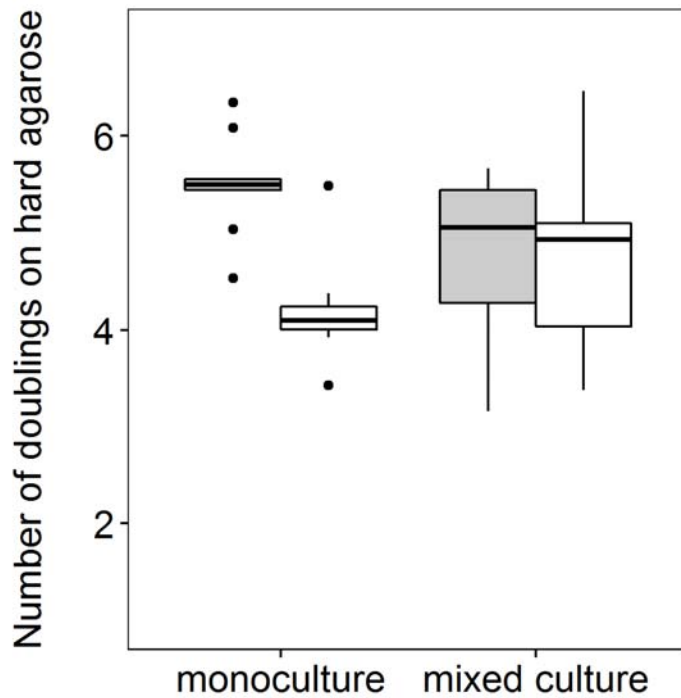

654

**Figure 5.** Pyoverdine sharing is impeded on hard surfaces. While the previous experiments showed  
656 that pyoverdine is extensively shared between neighbouring microcolonies on relatively soft surfaces  
(1 % agarose), efficient sharing was no longer possible on hard surfaces (2 % agarose) even when  
658 non-producers (open squares) were located next to producers (filled squares). Boxplots represent the  
median with 25<sup>th</sup> and 75<sup>th</sup> percentiles and whiskers show the 1.5 IQR.

660
